# Supplementary material for: Tunable redox hopping charge transport and electrochromism in multivariate MOFs: effects of substitution patterns and number of sulfonic acid groups
Source: Royal Society of Chemistry journal article supplement (doi:10.1039/d6sc02965e), 2026-06-04
Supplement: d6sc02965e1.pdf [file d6sc02965e1.pdf]

## Supporting Information

for

### Tunable redox hopping charge transport and electrochromism in multivariate MOFs: effects of substitution patterns and number of sulfonic acid groups

Sumanta Basak <sup>a</sup>, Laura Prince <sup>a</sup>, Zhengyu Du <sup>b</sup>, and Amanda J. Morris <sup>a,b\*</sup>

<sup>a</sup>Department of Chemistry, Virginia Polytechnic Institute and State University, Blacksburg, Virginia 24061, United States

<sup>b</sup>Macromolecules Innovation Institute, Virginia Polytechnic Institute and State University, Blacksburg, Virginia 24061, United States

| <b>Contents</b>                                                                                                             | <b>Page</b>   |
|-----------------------------------------------------------------------------------------------------------------------------|---------------|
| Materials                                                                                                                   | <b>S2</b>     |
| Characterization methods                                                                                                    | <b>S2-S4</b>  |
| Synthesis of chromophore, sulfonated linkers, and MTV MOFs                                                                  | <b>S4-S7</b>  |
| Cross-section SEM images of MTV MOF thin films                                                                              | <b>S8</b>     |
| Electronic absorption and transmittance spectra of Ru2S, Ru3S, Ru4S                                                         | <b>S9-10</b>  |
| Anson plots of the MTV MOF thin films                                                                                       | <b>S12</b>    |
| CVs of Ru2S, Ru3S, Ru4S without chromophore                                                                                 | <b>S13</b>    |
| Overview of reported framework-based electrochromic materials in the literature compared with the present study.            | <b>S14-15</b> |
| Overview of reported diffusion coefficients and cycling stability of MOF in the literature compared with the present study. | <b>S15-17</b> |

\*Email: [ajmorris@vt.edu](mailto:ajmorris@vt.edu)

## 1. Materials

The following chemicals were all purchased from AmBeed (Buffalo Grove, IL, USA):  $\text{RuCl}_3 \cdot 3\text{H}_2\text{O}$  (97%), 2,2';6',2''-terpyridine (97%), 2,2'-bipyridine-5,5'-dicarboxylic acid (97%), 4-aminotoluene-3-sulfonic acid (98%), 4,4'-dimethyl-1,1'-biphenyl (97%). Ethanol was obtained from Decon Labs Inc. (Swedeland, PA, USA). LiCl, potassium permanganate, 4,4'-biphenyl dicarboxylic acid, and glacial acetic acid were purchased from Oakwood Chemical (Estill, SC, USA). Triethylamine (99.5%), copper powder (99.99% trace metals basis), lithium perchlorate (99.99% trace metals basis), potassium hydroxide (ACS reagent,  $\geq 85\%$ , pellets), fuming sulfuric acid, Deuterium oxide with 99.9 atom% D and 0.05 wt. % 3-(trimethylsilyl)propionic-2,2,3,3- $\text{d}_4$  acid, sodium salt, and  $\text{ZrCl}_4$  ( $\geq 99.9\%$  trace metals basis) were obtained from Sigma-Aldrich (St. Louis, MO, USA). The following chemicals were purchased from Thermo Fisher Scientific (Waltham, MA, USA): acetonitrile, potassium nitrite, potassium iodide (99%), sulfuric acid, N,N-dimethylformamide (DMF,  $\geq 99.8\%$ ), acetone, sodium hydroxide, and hydrochloric acid. FTO slides were purchased from Hartford Glass Co., Inc. (Hartford City, IN, USA).

## 2. Characterization methods

### 2.1 Nuclear magnetic resonance (NMR) spectroscopy

All  $^1\text{H}$  experiments were performed on the JEOL ECZ 400 (400 MHz).  $^{13}\text{C}$  experiments were performed on the Bruker Avance Neo 600 (600 MHz). For quantitative analysis, 64 scans with a 10 s relaxation delay were used.

### 2.2 Powder X-ray diffraction (PXRD)

PXRD patterns for the MOF films were collected on a Bruker D8 Advance Wide Angle X-Ray diffractometer with a Cu  $k_{\alpha}$  ( $\lambda = 0.1541$  nm) radiation source generated at 40 kV and 40 mA. The measurements were collected from  $2\theta$  values of  $2^{\circ}$  to  $60^{\circ}$  with a resolution of  $0.02^{\circ}$  at a rate of  $0.25^{\circ}$  per minute.

### **2.3 Absorbance measurements**

Absorbance measurements were taken on a Cary UV-Vis-NIR spectrophotometer from Agilent Technologies. Spectral scan measurements were taken in MeCN from 800 nm to 200 nm at a scan rate of 600 nm per minute.

For the kinetic studies, absorbance at a chosen wavelength was monitored with data points recorded every 0.033 s. The MOF film was mounted in a glass cuvette, aligned so that the beamline passed directly through it. The cuvette was filled with 0.1 M  $\text{LiClO}_4$  in MeCN, and an  $\text{Ag}/\text{AgNO}_3$  reference electrode, together with a platinum counter electrode, was inserted into the cell without obstructing the beam path. A standard spectral scan was used to identify the  $\lambda_{\text{max}}$ , while a cyclic voltammogram recorded at 100 mV/s provided the redox potential. Kinetics were then probed using a cyclic step chronoamperometry experiment, in which 1800 mV vs. NHE was applied, followed by the open circuit potential (OCP).

### **2.4 Scanning electron microscopy (SEM)**

SEM images were collected with a LEO 1550 field-emission scanning electron microscope (Carl Zeiss, Oberkochen, Germany) at 5.0 kV and a 7.0 mm working distance.

### **2.5 Raman spectroscopy**

Raman spectra of the MOF thin films were obtained through the excitation of a 532 nm laser. Raman signals were collected with a CCD camera (Horiba XploRA PLUS). The measurements were conducted under ambient conditions. The Raman spectra were obtained using a 10x objective lens.

## 2.6 Electrochemical measurements

Electrochemical characterization was carried out using a Pine Instruments WaveNow potentiostat in a three-electrode configuration, with the MOF-coated FTO slide serving as the working electrode, an Ag/AgNO<sub>3</sub> reference electrode, and a platinum mesh counter electrode. All measurements were performed in 0.1 M LiClO<sub>4</sub>/MeCN electrolyte solution. Cyclic voltammetry was conducted by sweeping the potential to 2000 mV vs. NHE, extending beyond the Ru<sup>2+/3+</sup> redox couple. At least six consecutive scans were recorded to ensure stabilization of the current response, and the final cycle was used for analysis. The scan rate was systematically varied between 10 and 1000 mV/s to provide the data required for diffusion coefficient determination.

## 3. Synthesis of the chromophore and sulfonated linkers

### 3.1 [Ru(tpy)(dcbpy)Cl]PF<sub>6</sub> synthesis

[Ru(tpy)(dcbpy)Cl]PF<sub>6</sub> (where tpy = 2,2';6',2''-terpyridine and dcbpy = 2,2' -bipyridine-5,5'-dicarboxylic acid) was synthesized according to a previously developed synthetic method.<sup>1</sup> RuCl<sub>3</sub> (156.8 mg, 0.7 mmol) was mixed with 2,2';6',2''- terpyridine (172.8 mg, 0.7 mmol) in 50 mL of ethanol. The mixture was refluxed for 4 hours at 100 °C, and a brown solid was filtered (Ru(tpy)Cl<sub>3</sub>). Ru(tpy)Cl<sub>3</sub> (1 g, 2.27 mmol) was then added to 2,2' -bipyridine-5,5' -dicarboxylic acid (509 mg, 2.08 mmol), LiCl (100 mg, 2.35 mmol) and triethylamine (1 mL) in 3: 1 ethanol: water (100 mL). The reaction was refluxed for 16 hours at 100 °C. The reaction mixture was

filtered in hot condition and reduced to 25 mL by rotary evaporation and 15 mL of saturated  $\text{NH}_4\text{PF}_6$  solution was added. 1 M HCl was added dropwise until  $[\text{Ru}(\text{tpy})(\text{dcbpy})\text{Cl}]\text{PF}_6$  was precipitated.  $^1\text{H}$  NMR: (400 MHz,  $\text{DMSO-d}_6$ ):  $\delta$  7.31 (2 H, m), 7.61 (1 H, s), 7.69 (2 H, m), 7.99 (2 H, t), 8.12 (d, 1 H, d), 8.28 (1 H, t), 8.69 (3 H, m), 8.79 (1 H, d), 8.85 (2 H, d), 9.15 (1 H, d), 10.6 (1 H, d).

## **3.2 Synthesis of sulfonated linkers**

### **3.2.1 Synthesis of Biphenyl-2,2'-disulfonyl-4,4'-dicarboxylic acid**

For the synthesis of Biphenyl-2,2'-disulfonyl-4,4'-dicarboxylic acid, a previously developed method was used.<sup>2</sup> Potassium nitrite was slowly added to a solution containing 4-aminotoluene-3-sulfonic acid at 3-5 °C and was stirred for 2 hours. The solid wet mass produced was added to a mixture of potassium iodide and 25% sulfuric acid and was heated. The resulting precipitate (2-iodo-5-methylbenzene sulfonic acid) was dissolved in a solution containing copper sulfate and heated for 15 mins at 90 °C. Copper powder was then added, and the solutions were allowed to stir for 5 hours. After filtration, the product was recrystallized. The product (4,4'-dimethylbiphenyl-2,2'-disulfonic acid (11.0 mmol) was then placed in a solution containing potassium hydroxide. The solution was then heated to 50 °C, and potassium permanganate was added slowly over a period of 2 hours, followed by stirring for an additional 20 hours. After filtration, the product 2,2'-disulfonyl-4,4'-biphenyldicarboxylic acid was collected.  $^1\text{H}$  NMR: (400 MHz,  $\text{D}_2\text{O}$ ):  $\delta$  8.52 (2 H, s), 8.25 (2 H, d), 7.75 (2 H, dd).

### **3.2.2 Synthesis of Biphenyl-3,3'-disulfonyl-4,4'-dicarboxylic acid**

Biphenyl-3,3'-disulfonyl-4,4'-dicarboxylic acid was synthesized following a literature procedure.<sup>3</sup> 4,4'-Dimethylbiphenyl (10 g) was stirred in concentrated sulfuric acid (30 mL; 98%) at 90 °C for 8 h. After cooling, acetonitrile and dichloromethane were added to precipitate 3,3'-disulfonyl-4,4'-

dimethylbiphenyl, which was dried and dissolved in 75 mL aqueous NaOH (pH 12).  $\text{KMnO}_4$  (12 g) was added, and the mixture was heated at 90 °C overnight. The resulting brown solid was filtered off, and the filtrate was acidified with 12 M HCl and refrigerated for 10 h to precipitate the product, which was collected and washed with 1 M HCl.  $^1\text{H NMR}$ : (400 MHz,  $\text{DMSO-d}_6$ ):  $\delta$  8.10 (2 H, s), 7.85 (4H, s).

### 3.2.3 Synthesis of Biphenyl-3,3',5,5'-tetrasulfonyl-4,4'-dicarboxylic acid

The compound was synthesized following a previously reported procedure.<sup>4</sup> For the synthesis of Biphenyl-3,3',5,5'-tetrasulfonyl-4,4'-dicarboxylic acid, 4,4'-dimethylbiphenyl (500 mg) was stirred with 10 mL of fuming  $\text{H}_2\text{SO}_4$  at 90 °C. The reaction mixture was subsequently added to acetonitrile, yielding a white precipitate, which was washed sequentially with acetonitrile and dichloromethane to afford Biphenyl-3,3',5,5'-tetrasulfonyl-4,4'-dimethyl. The intermediate product was dissolved in 50 mL of aqueous NaOH and heated at 50 °C. Potassium permanganate was added slowly over 2 hours, and the mixture was stirred for an additional 20 hours. After filtration, the final product, Biphenyl-3,3',5,5'-tetrasulfonyl-4,4'-dicarboxylic acid, was obtained by acidification with 12 M HCl.  $^1\text{H NMR}$ : (400 MHz,  $\text{D}_2\text{O}$ ):  $\delta$  8.38 (4 H, s).  $^{13}\text{C NMR}$  (151 MHz,  $\text{D}_2\text{O}$ ):  $\delta$  165.50, 140.67, 138.55, 130.44, 128.73. ESI-MS(+) ( $\text{H}_2\text{O}$ ): Calculated for 561.384, found: 561.399.

**Safety considerations:** Fuming sulfuric acid is an extremely hazardous chemical that requires strict safety precautions due to its highly corrosive and strongly oxidizing nature. It should always be handled in a well-ventilated fume hood while wearing appropriate personal protective equipment, including acid-resistant gloves, a lab coat or apron, eye protection, and, if necessary, a respirator.

## 4. MTV MOF Synthesis

For the synthesis of RuTPY-UiO-67, a previously developed synthetic procedure was used.<sup>5</sup> ZrCl<sub>4</sub> (58.25 mg, 0.25 mmol), biphenyl dicarboxylic acid (50.8 mg, 0.21 mmol), and [Ru(tpy)(dcbpy)Cl]PF<sub>6</sub> (32.6 mg, 0.043 mmol) were added to a 6-dram vial along with DMF (10 mL) and glacial acetic acid. The solution was sonicated, and a clean FTO slide was placed inside with the conductive side facing down. The MOF was then grown solvothermally in an oven at 120 °C for 1 day. After heating, the films were removed, rinsed with DMF, and stored in fresh water for 24 hrs. Ru2S, Ru3S, and Ru4S MTV MOF thin films were prepared using the same procedure as above; however, the BPDC ligand was substituted for corresponding sulfonated ligands.

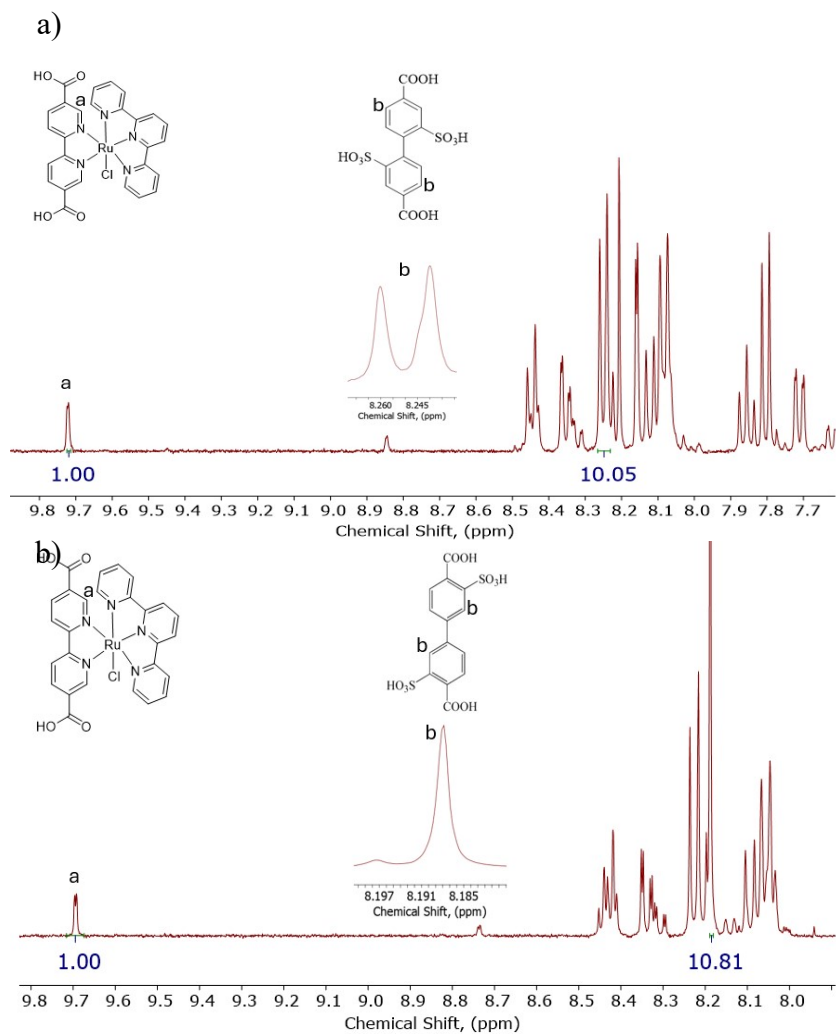

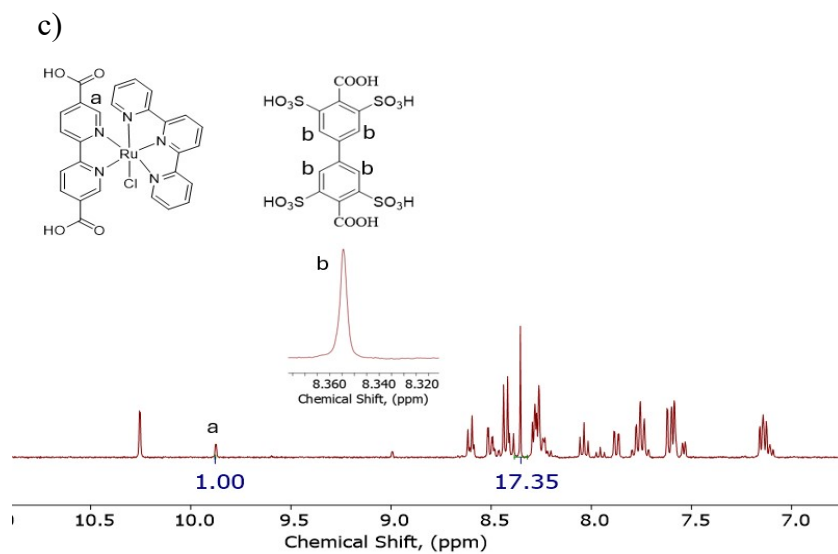

**Fig. S1**  $^1\text{H}$  NMR spectrum of digested (a) Ru2S, (b) Ru3S, and (c) Ru4S MOFs.

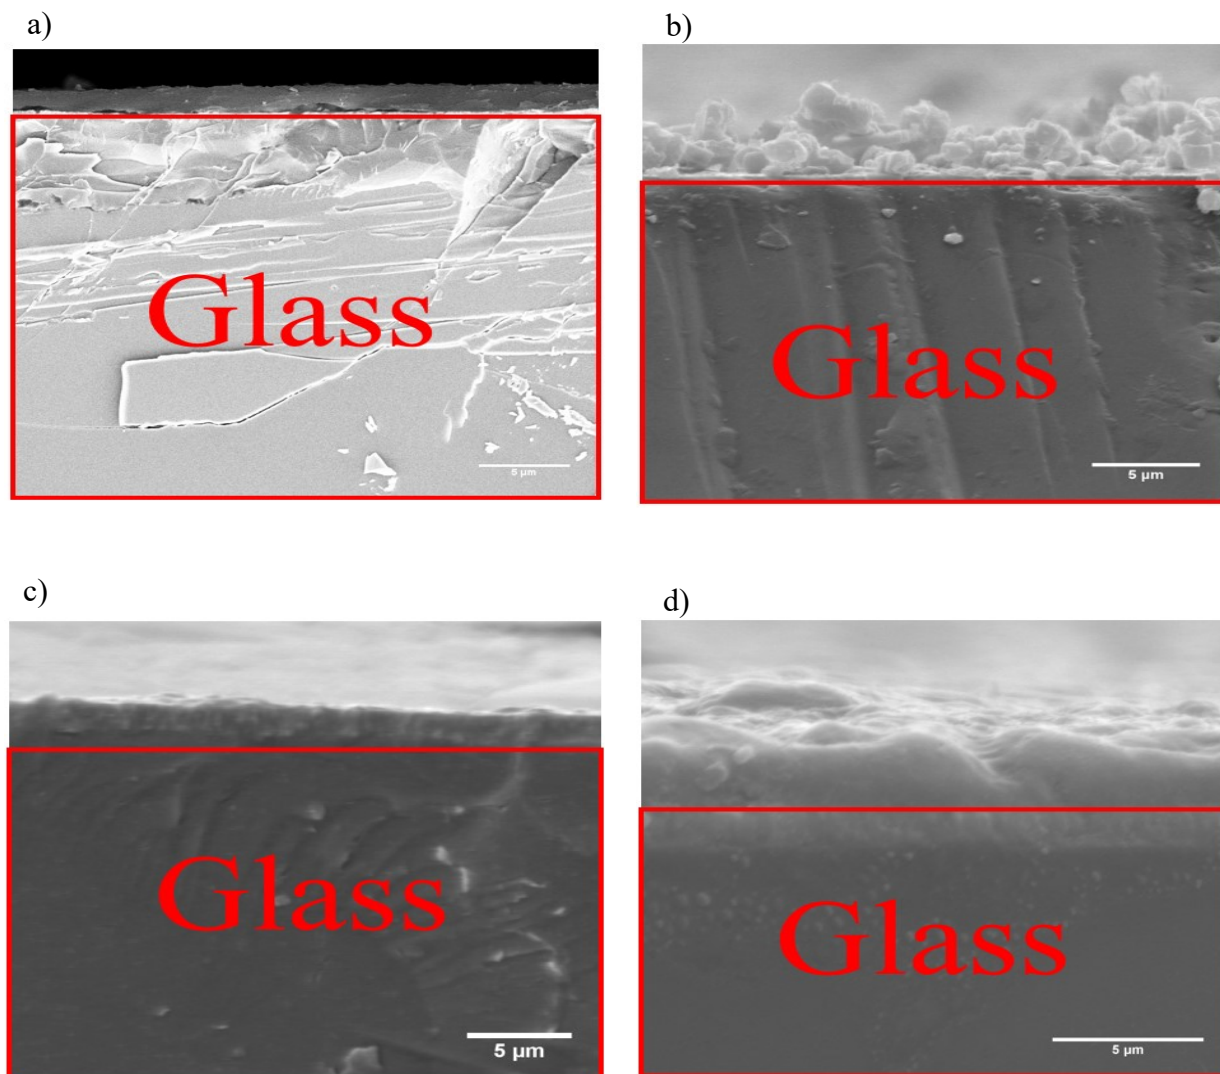

**Fig. S2** Cross-section SEM images of (a) RuTPY-UiO-67, (b) Ru2S, (c) Ru3S, and (d) Ru4S MOF thin films on FTO. The “Glass” label denotes the bulk substrate below the thin fluorine-doped tin oxide (FTO) layer. The FTO layer serves as the conductive electrode for the MOF film. Average film thicknesses were determined using ImageJ software.

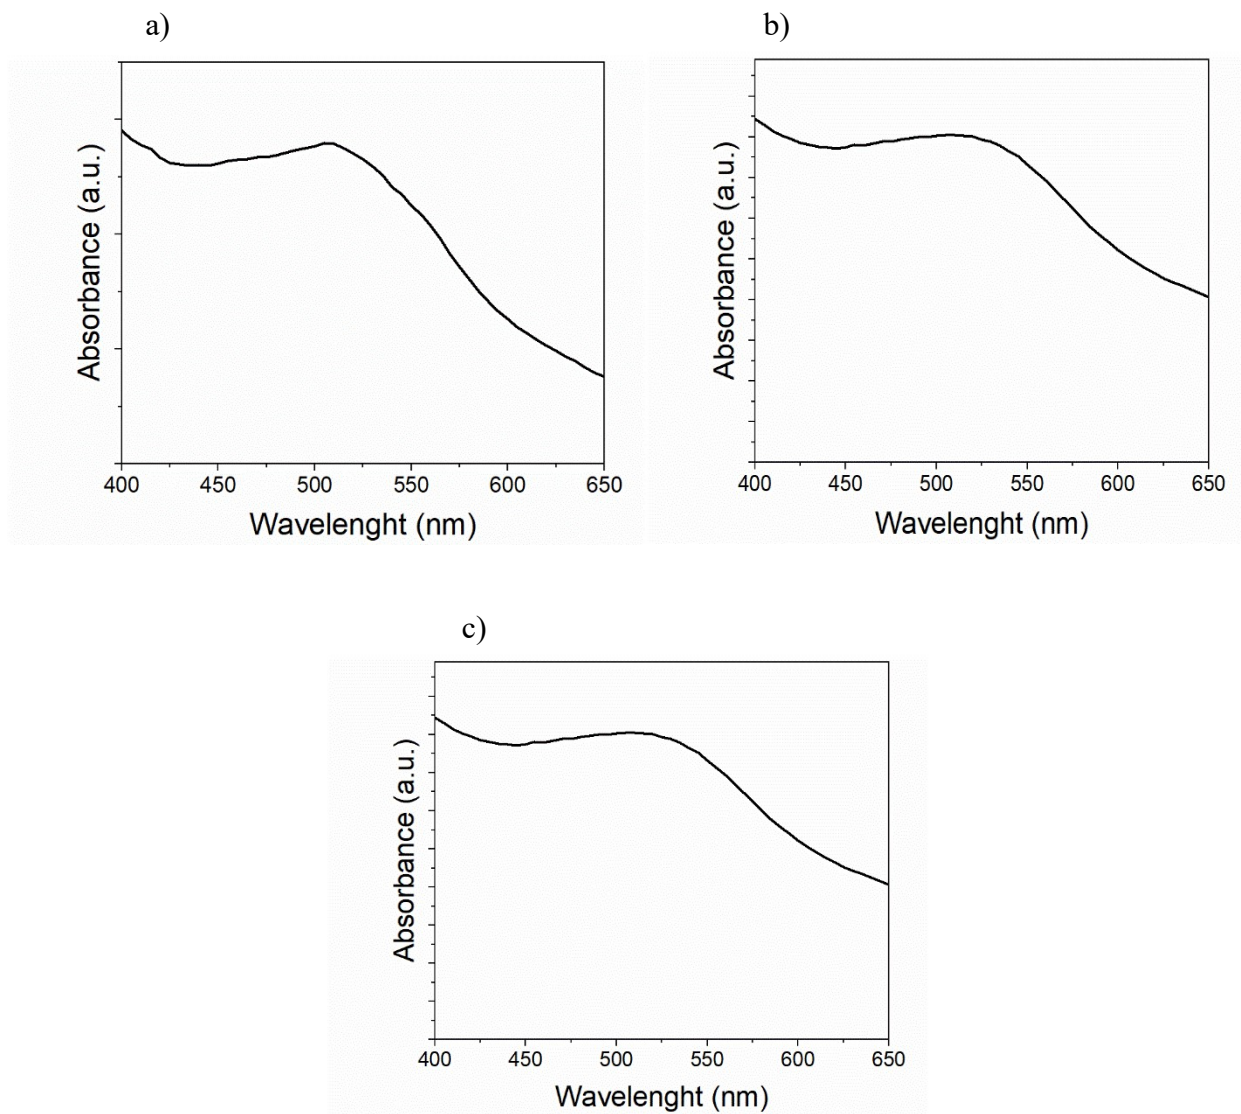

**Fig. S3** The electronic absorption spectra of (a) Ru2S, (b) Ru3S, and (c) Ru4S.

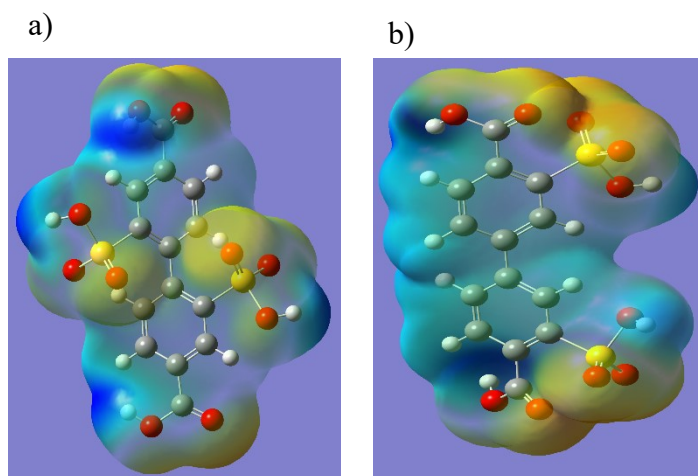

**Fig. S4** Electrostatic potential maps of (a) 2,2'- and (b) 3,3'-disulfonated biphenyl linkers.

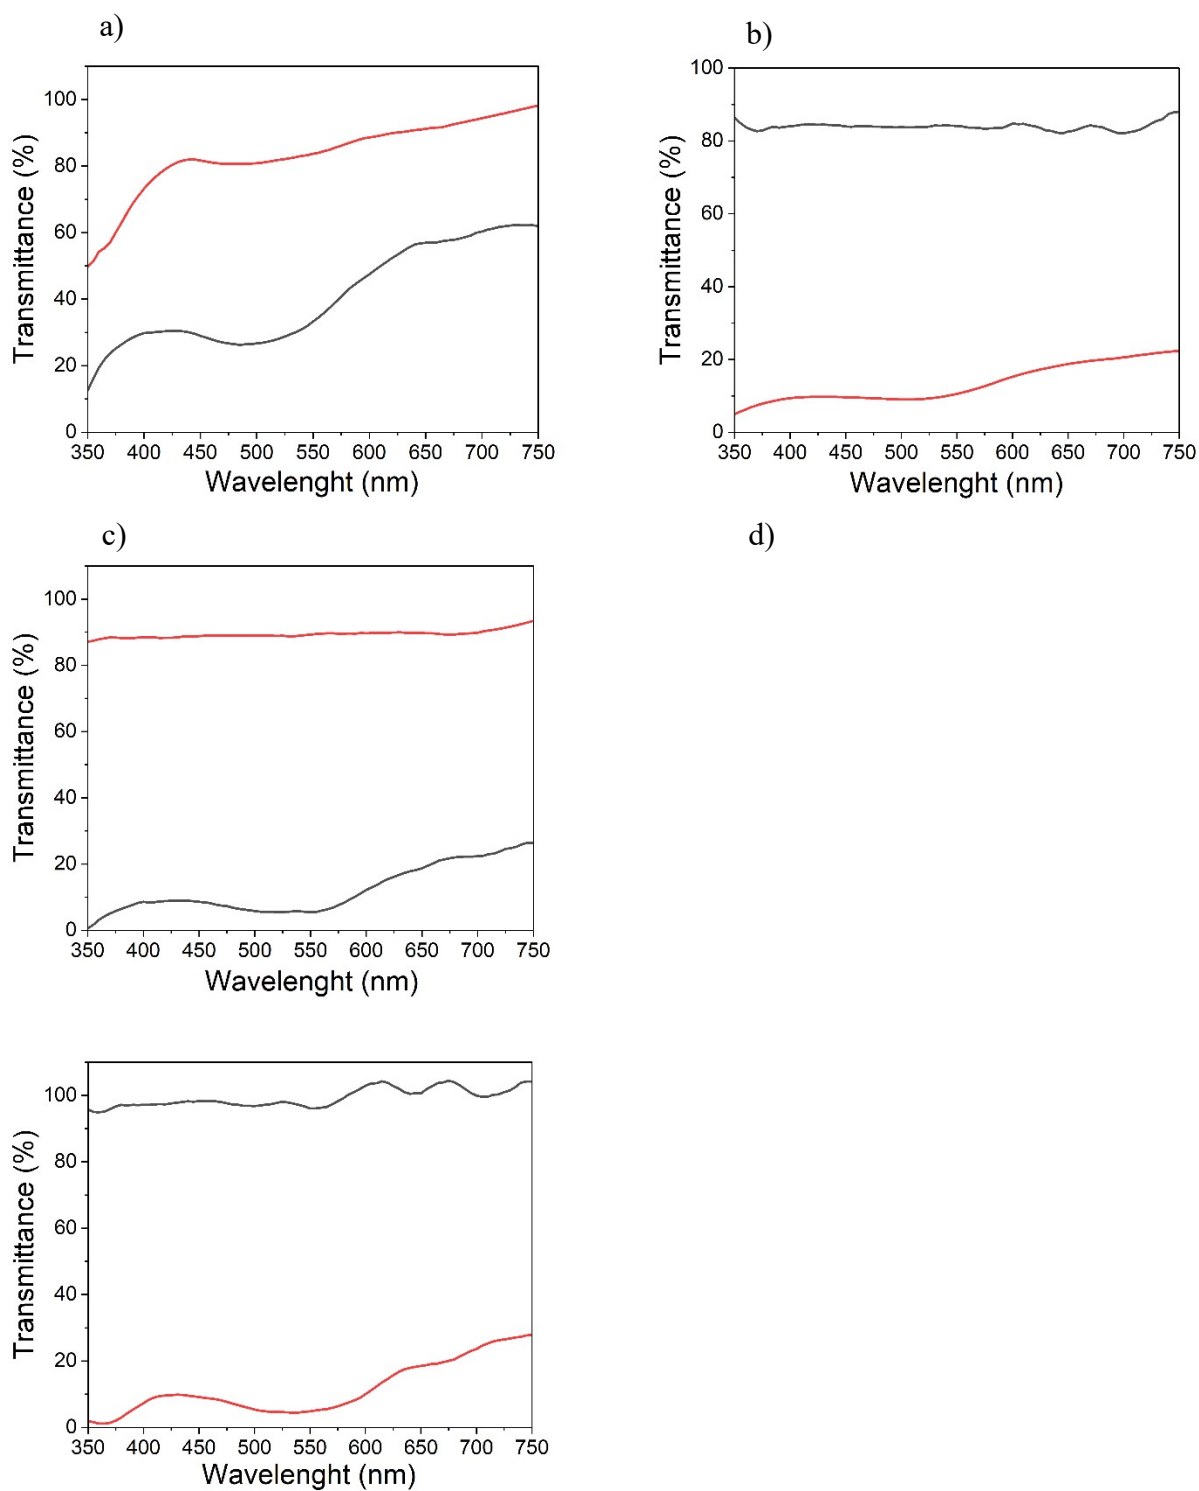

**Fig. S5** UV-vis transmittance spectra of (a) RuTPY-UiO-67, (b) Ru2S, (c) Ru3S and (d) Ru4S MOF thin films at colored (black line) and bleached (red line) states.

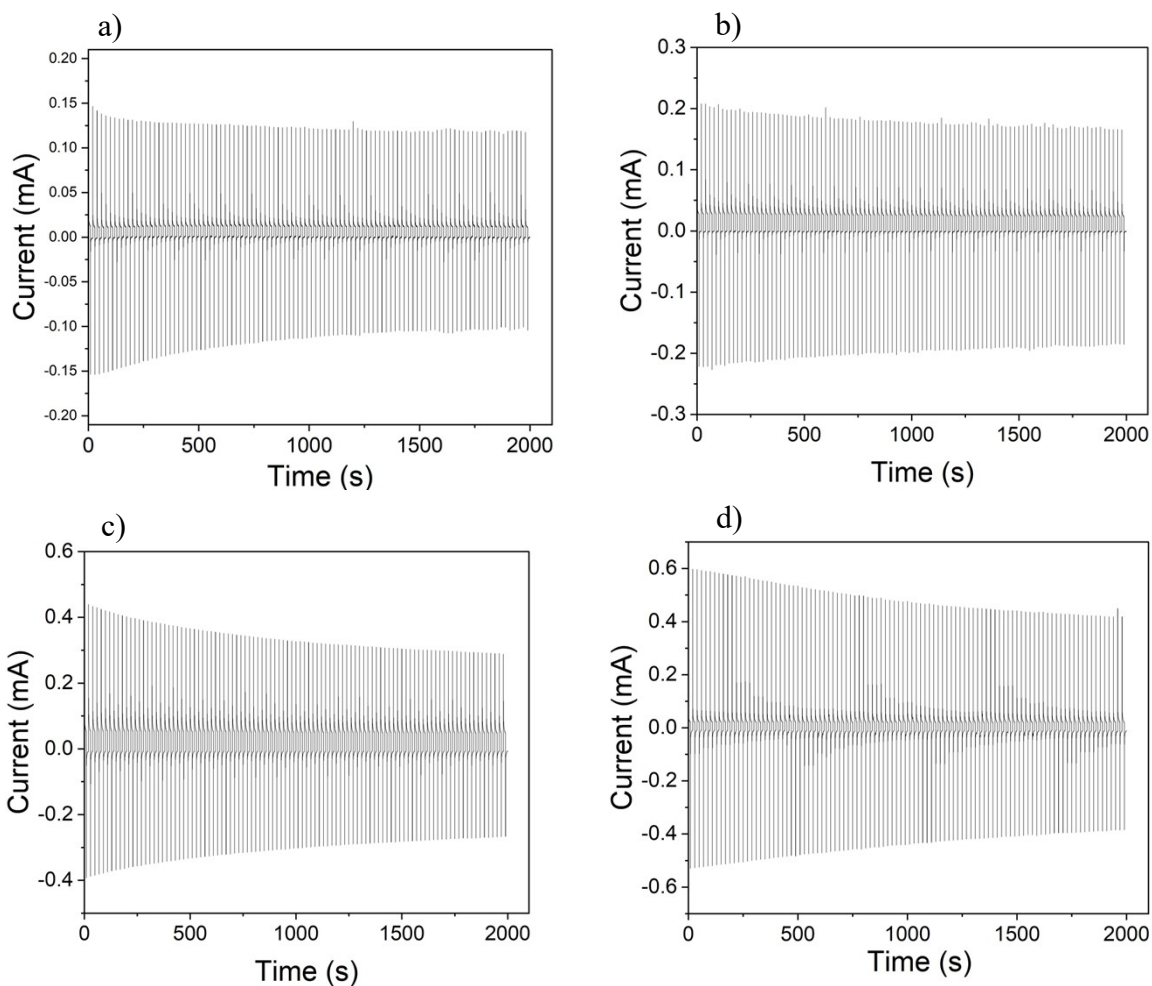

**Fig. S6** Stability for 100 cycles of (a) RuTPY-UiO-67, (b) Ru2S, (c) Ru3S and (d) Ru4S MOF thin films.

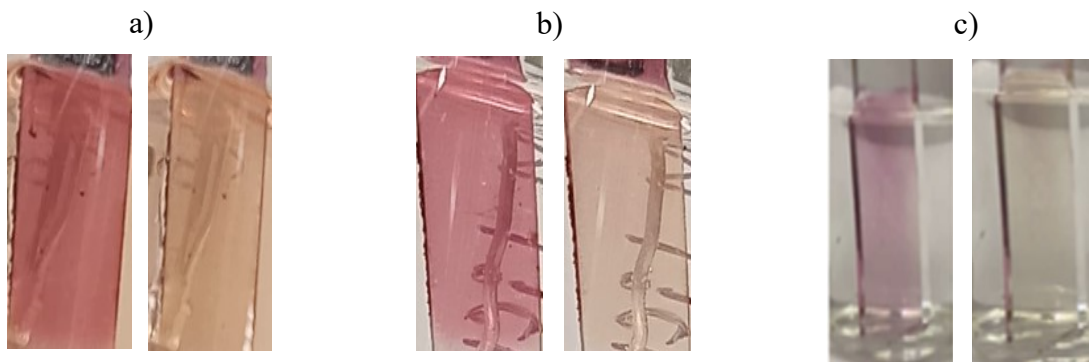

**Fig. S7** Photographs of (a) Ru2S, (b) Ru3S and (c) Ru4S MOF thin films in colored (left) and bleached (right) states.

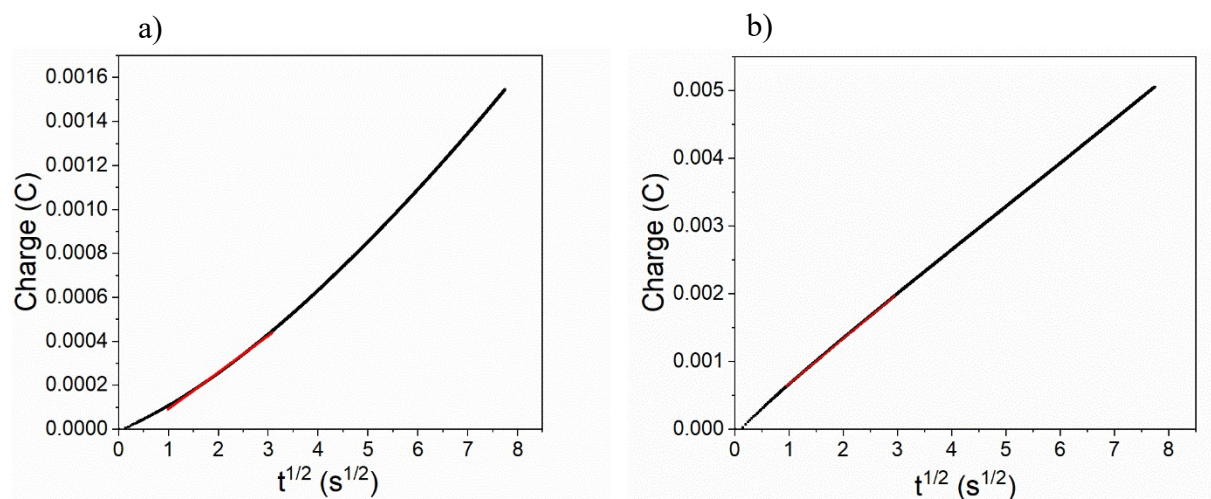

**Fig. S8** Chronocoulometric Anson plots for (a) RuTPY-UiO-67 and (b) Ru4S. The red traces highlight the linear regions that were used to extract the slopes for calculating  $D_{app}$ .

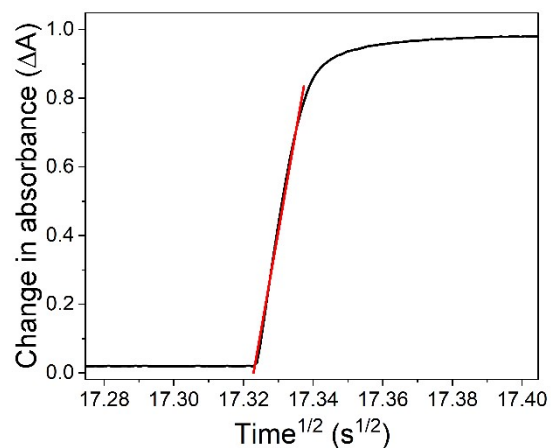

**Fig. S9** Plot of  $\Delta A$  versus  $t^{1/2}$  at the characteristic wavelength of the Ru4S MOF thin film. The red line denotes the linear region used to extract the slope, which was then used to calculate the  $D_{app}$ .

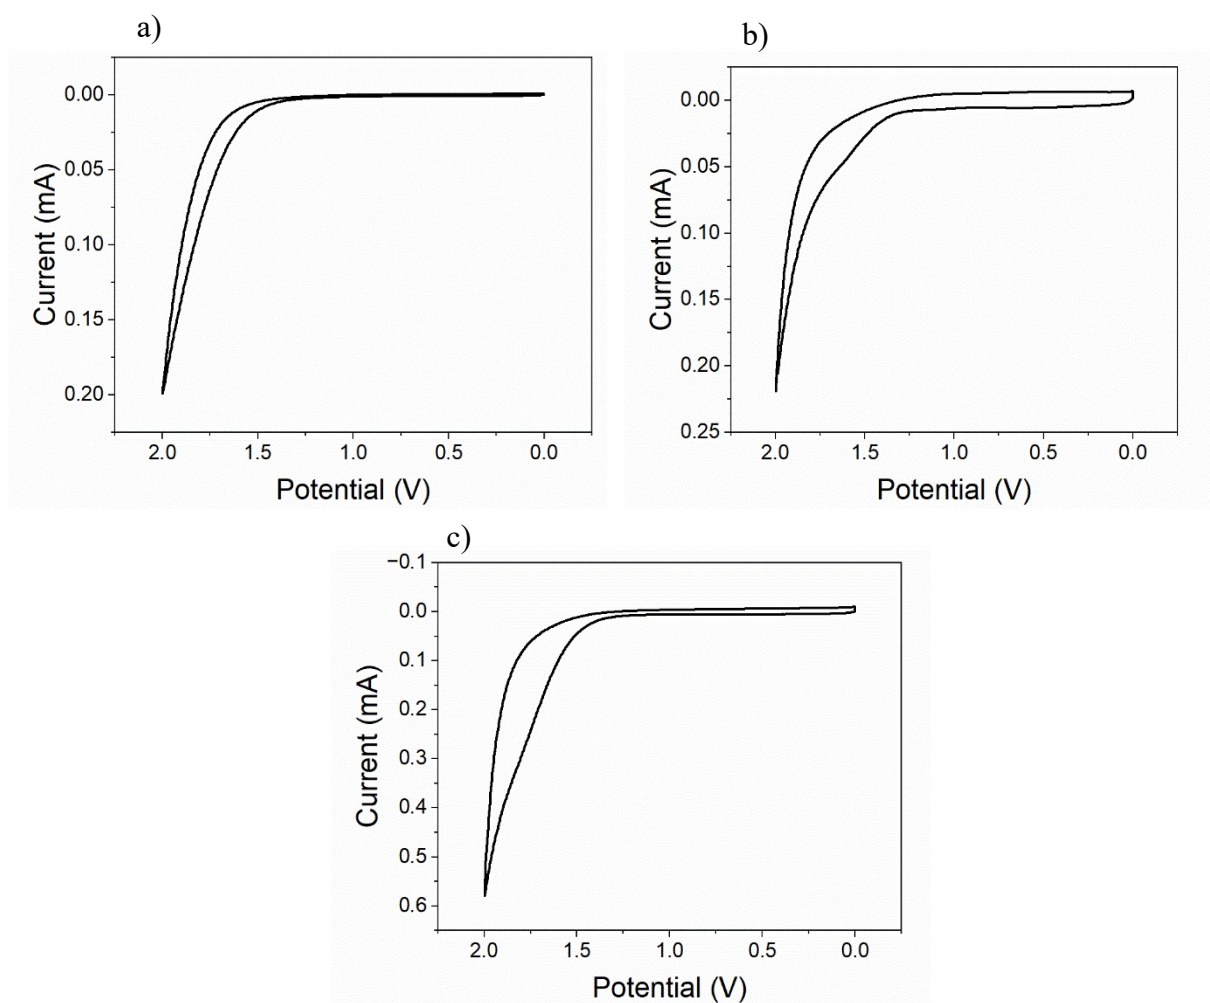

**Fig. S10** CVs for chromophore-free (a) Ru<sub>2</sub>S, (b) Ru<sub>3</sub>S, and (c) Ru<sub>4</sub>S. These data prove that the sulfonated frameworks by themselves lack redox activity within the investigated potential range.

**Table S1.** Overview of reported framework-based electrochromic materials in the literature compared with the present study.

| <b>Redox-active MOFs</b>                                            | <b>Coloration time<br/>(<math>t_c</math>) in seconds</b> | <b>Bleaching<br/>time (<math>t_b</math>) in<br/>seconds</b> | <b>CE<br/>(<math>\text{cm}^2/\text{C}</math>)</b> | <b>Optical<br/>contrast<br/>(%)</b> | <b>References</b> |
|---------------------------------------------------------------------|----------------------------------------------------------|-------------------------------------------------------------|---------------------------------------------------|-------------------------------------|-------------------|
| Zn (NDI-ATZ)                                                        | 4.35                                                     | 7.72                                                        | 99.14                                             | 6.45                                | 6                 |
| Zn-TCA (TCA= 4,4',4''-tricarboxytriphenylamine)                     | 4.5                                                      | 6.2                                                         | 57                                                | 57                                  | 7                 |
| HKUST-1+ZnMOF-74                                                    | 10                                                       | 8                                                           | N.A.                                              | 64                                  | 8                 |
| Cu-HHTP (HHTP = 2,3,6,7,10,11-Hexahydroxytriphenylene)              | 3.2                                                      | 5.9                                                         | 632                                               | 40.2                                | 9                 |
| Ni- BINDI (BINDI = N,N-bis (5-isophthalic acid)-naphthalenediimide) | 9.5                                                      | 5.1                                                         | 132                                               | 42                                  | 10                |
| Ni-MOF-74                                                           | 23                                                       | 29                                                          | N.A.                                              | 44.4                                | 11                |
| Zn-PDI                                                              | 2.6                                                      | 1.6                                                         | 941                                               | 96.4                                | 12                |
| Zn-NDI                                                              | 3.7                                                      | 4                                                           | 610                                               | 97.1                                | 12                |
| Zn-PMDI                                                             | N.A.                                                     | N.A.                                                        | 753                                               | 89.5                                | 12                |
| NU-901                                                              | 5                                                        | 12                                                          | 204                                               | 64                                  | 13                |
| COF <sub>TAPT-TFPB</sub>                                            | 18.6                                                     | 0.7                                                         | 297.4                                             | 50.23                               | 14                |
| triphenylamine-based<br>ECOF                                        | 13.6                                                     | 17.8                                                        | 154.66                                            | 25.7                                | 15                |
| Imine-linked COF                                                    | 4.9                                                      | 10.6                                                        | 144                                               | ~60%                                | 16                |
| COF-GZU1                                                            | ~7.8–14.5                                                | ~1.0–12.6                                                   | 112.8-<br>127                                     | N.A.                                | 17                |
| Py-ttTII COF                                                        | 0.2                                                      | 0.4                                                         | 858                                               | N.A.                                | 18                |

|      |      |      |     |      |           |
|------|------|------|-----|------|-----------|
| Ru2S | 4.25 | 5.26 | 225 | 57.1 | This Work |
| Ru3S | 2.65 | 3.45 | 351 | 78.2 | This Work |
| Ru4S | 1.09 | 1.5  | 641 | 89.2 | This Work |

**Table S2.** Overview of reported diffusion coefficients of MOFs in the literature compared with the present study.

| <b>Redox-active MOFs</b>                                | <b>Diffusion coefficient (cm<sup>2</sup>/s)</b> | <b>References</b> |
|---------------------------------------------------------|-------------------------------------------------|-------------------|
| Metalloocene-doped NU-1000                              | $\sim 10^{-10} - 10^{-9}$                       | 19                |
| CoTCPP (TCPP = [5,10,15,20-(4-carboxyphenyl)porphyrin]) | $7.55(\pm 0.05) \times 10^{-14}$                | 20                |
| NU-1000                                                 | $2 \times 10^{-10}$                             | 21                |
| Zr-(dcphOH-NDI)                                         | $5.4(\pm 1.1) \times 10^{-11}$                  | 22                |
| Ir-UiO-66                                               | $10^{-12}$                                      | 23                |
| Hemin-UiO-66                                            | $10^{-9}$                                       | 24                |
| Ru2S                                                    | $(3 \pm 2) \times 10^{-8}$                      | This Work         |
| Ru3S                                                    | $(1.3 \pm 0.5) \times 10^{-7}$                  | This Work         |

|      |                            |           |
|------|----------------------------|-----------|
| Ru4S | $(5 \pm 3) \times 10^{-6}$ | This Work |
|------|----------------------------|-----------|

**Table S3.** Overview of reported MOF cycling stability in the literature compared with the present study.

| Electrochromic MOFs                                                                   | Supporting electrolyte                                     | Substrate | Cycle number | References |
|---------------------------------------------------------------------------------------|------------------------------------------------------------|-----------|--------------|------------|
| Zn(NDI-H)<br>[NDI = naphthalenediimide]                                               | 0.1 M<br>[(nBu) <sub>4</sub> N]<br>PF <sub>6</sub> /DMF    | FTO       | 25           | 25         |
| Ni-NDISA                                                                              | 0.1 M<br>[(nBu) <sub>4</sub> N]<br>PF <sub>6</sub> /DMF    | FTO       | 10           | 26         |
| Zn-DSNDI                                                                              | 0.1 M<br>[(nBu) <sub>4</sub> N]<br>PF <sub>6</sub> /DMF    | ZnO/FTO   | 10           | 27         |
| Zr-BINDI<br>[BINDI = N,N'-bis (5-isophthalic acid) naphthalenediimide]                | 0.1 M<br>[(nBu) <sub>4</sub> N]<br>PF <sub>6</sub> /DMF    | ITO       | 100          | 28         |
| Zn(NDIATZ)(NBU-3)                                                                     | 0.1 M<br>[(nBu) <sub>4</sub> N]<br>PF <sub>6</sub>         | FTO       | 6            | 29         |
| N-doped NiO@C Ni MOF                                                                  | 1 M KOH solution                                           | ITO       | 50           | 30         |
| NU-901 (Zr-TBAPy)                                                                     | 0.1 M TBAPF <sub>6</sub> /<br>DCM                          | FTO       | 60           | 31         |
| Mg-MOF-74                                                                             | 0.2 M LiClO <sub>4</sub> /<br>MeCN                         | FTO       | 100          | 32         |
| Zn-NDI                                                                                | 0.5 M KPF <sub>6</sub> / DMF                               | FTO       | 50           | 12         |
| Ni-HITP205<br>[HITP = Hexaiminotriphenylene]                                          | 0.1 M LiClO <sub>4</sub> /PC<br>(PC = Propylene carbonate) | FTO       | 100          | 33         |
| Cu-TCA<br>[TCA=tricarboxytriphenylamine]                                              | 0.1 M LiClO <sub>4</sub> /PC                               | ITO       | 500          | 34         |
| Cu <sub>3</sub> (HHTP) <sub>2</sub><br>[HHTP = 2,3,6,7,10,11-hexahydroxytriphenylene] | 0.1 M LiClO <sub>4</sub> /PC                               | FTO       | 100          | 35         |
| Ru2S                                                                                  | 0.1 M<br>LiClO <sub>4</sub> /CH <sub>3</sub> CN            | FTO       | 100          | This Work  |

|      |                                                 |     |     |           |
|------|-------------------------------------------------|-----|-----|-----------|
| Ru3S | 0.1 M<br>LiClO <sub>4</sub> /CH <sub>3</sub> CN | FTO | 100 | This Work |
| Ru4S | 0.1 M<br>LiClO <sub>4</sub> /CH <sub>3</sub> CN | FTO | 100 | This Work |

## References

- 1 B. Gibbons, D. R. Cairnie, B. Thomas, X. Yang, S. Ilic and A. J. Morris, *Chem. Sci.*, 2023, **14**, 4672–4680.
- 2 J. Zhao, X. He, Y. Zhang, J. Zhu, X. Shen and D. Zhu, *Cryst. Growth Des.*, 2017, **17**, 5524–5532.
- 3 L.-J. Zhou, W.-H. Deng, Y.-L. Wang, G. Xu, S.-G. Yin and Q.-Y. Liu, *Inorg. Chem.*, 2016, **55**, 6271–6277.
- 4 Q. Chen, F. Shao, G. Wu, D Izuhara and H. Umeda, *WO 2013/040985 A1*, 2016.
- 5 S. Lin, Y. Pineda-Galvan, W. A. Maza, C. C. Epley, J. Zhu, M. C. Kessinger, Y. Pushkar and A. J. Morris, *ChemSusChem*, 2017, **10**, 514–522.
- 6 P. P. More, P. V. Rathod, J. M. C. Puguan and H. Kim, *Dyes Pigm.*, 2021, **195**, 109730.
- 7 J. Liu, X. Y. D. Ma, Z. Wang, L. Xu, F. Wang, C. He and X. Lu, *ACS Appl. Electron. Mater.*, 2021, **3**, 1489–1495.
- 8 I. Mjejri, C. M. Doherty, M. Rubio-Martinez, G. L. Drisko and A. Rougier, *ACS Appl. Mater. Interfaces*, 2017, **9**, 39930–39934.
- 9 R. Li, S. Li, Q. Zhang, Y. Li and H. Wang, *Inorg. Chem. Commun.*, 2021, **123**, 108354.
- 10 R. Li, K. Li, G. Wang, L. Li, Q. Zhang, J. Yan, Y. Chen, Q. Zhang, C. Hou, Y. Li and H. Wang, *ACS Nano*, 2018, **12**, 3759–3768.
- 11 N. Zhang, Y. Jin, Q. Zhang, J. Liu, Y. Zhang and H. Wang, *Ionics*, 2021, **27**, 3655–3662.
- 12 A. Kumar, J. Li, A. K. Inge and S. Ott, *ACS Nano*, 2023, **17**, 21595–21603.
- 13 C.-W. Kung, T. C. Wang, J. E. Mondloch, D. Fairen-Jimenez, D. M. Gardner, W. Bury, J. M. Klingsporn, J. C. Barnes, R. Van Duyne, J. F. Stoddart, M. R. Wasielewski, O. K. Farha and J. T. Hupp, *Chem. Mater.*, 2013, **25**, 5012–5017.
- 14 R.-Z. Li, Q. Hao, X.-R. Ren, C. Wen, L. Wang, Z.-L. Zhao, J.-Y. Shao, Y.-W. Zhong, D. Wang and L.-J. Wan, *ACS Appl. Mater. Interfaces*, 2024, **16**, 49594–49601.
- 15 Q. Chen, Y. Wang, J. Yu, Y. Si and P. Tang, *ACS Appl. Mater. Interfaces*, 2025, **17**, 67092–67102.
- 16 T. K. Dutta, S. Das, M. Sarkar, M. Bhattacharjee and A. Patra, *Chem. Mater.*, 2024, **16**, 8027–8036.
- 17 Y. Wang, R. Zheng, H. Li, Y. Liu, M. Tian, W. Wu, Q. Liu and C. Jia, *Chem. Eng. J.*, 2024, **497**, 154818.
- 18 D. Bessinger, K. Muggli, M. Beetz, F. Auras and T. Bein, *J. Am. Chem. Soc.*, 2021, **143**, 7351–7357.
- 19 P. J. Celis-Salazar, M. Cai, C. A. Cucinell, S. R. Ahrenholtz, C. C. Epley, P. M. Usov and A. J. Morris, *J. Am. Chem. Soc.*, 2019, **141**, 11947–11953.
- 20 S. R. Ahrenholtz, C. C. Epley and A. J. Morris, *J. Am. Chem. Soc.*, 2014, **136**, 2464–2472.
- 21 S. Goswami, I. Hod, J. D. Duan, C.-W. Kung, M. Rimoldi, C. D. Malliakas, R. H. Palmer, O. K. Farha and J. T. Hupp, *J. Am. Chem. Soc.*, 2019, **141**, 17696–17702.

- 22 B. A. Johnson, A. Bhunia, H. Fei, S. M. Cohen and S. Ott, *J. Am. Chem. Soc.*, 2018, **140**, 2985–2994.
- 23 C.-H. Chuang, J.-H. Li, Y.-C. Chen, Y.-S. Wang and C.-W. Kung, *J. Phys. Chem. C*, 2020, **124**, 20854–20863.
- 24 R. Shimoni, W. He, I. Liberman and I. Hod, *J. Phys. Chem. C*, 2019, **123**, 5531–5539.
- 25 C. R. Wade, M. Li and M. Dincă, *Angew. Chem. Int. Ed.*, 2013, **52**, 13377–13381.
- 26 K. AlKaabi, C. R. Wade and M. Dincă, *Chem*, 2016, **1**, 264–272.
- 27 X. Wu, K. Wang, J. Lin, D. Yan, Z. Guo and H. Zhan, *J. Colloid Interface Sci.*, 2021, **594**, 73–79.
- 28 G. Radha, S. Roy, C. Chakraborty and H. Aggarwal, *Chem. Commun.*, 2022, **58**, 4024–4027.
- 29 N. Zhang, Y. Jin, Q. Zhang, J. Liu, Y. Zhang and H. Wang, *Ionics*, 2021, **27**, 3655–3662.
- 30 Z. Zeng, X. Peng, J. Zheng and C. Xu, *ACS Appl. Mater. Interfaces*, 2021, **13**, 4133–4145.
- 31 C.-W. Kung, T. C. Wang, J. E. Mondloch, D. Fairen-Jimenez, D. M. Gardner, W. Bury, J. M. Klingsporn, J. C. Barnes, R. Van Duyne, J. F. Stoddart, M. R. Wasielewski, O. K. Farha and J. T. Hupp, *Chem. Mater.*, 2013, **25**, 5012–5017.
- 32 H. Shiozawa, Z. Melnikova, Z. Bastl, H. Peterlik, M. Kalbac and O. Frank, *Adv. Photon. Res.*, 2022, **3**, 2100219.
- 33 L. Pan, R. Li, C. Zhang, Z. Lu, K. Li, Q. Zhang, C. Hou, Y. Li and H. Wang, *ACS Appl. Electron. Mater.*, 2022, **4**, 2915–2922.
- 34 S. Feng, J. Wang, Z. Tong and H.-Y. Qu, *Chem. Eng. J.*, 2022, **442**, 136158.
- 35 R. Li, S. Li, Q. Zhang, Y. Li and H. Wang, *Inorg. Chem. Commun.*, 2021, **123**, 108354.
